# Supplementary material for: Porous metallic MoO2-supported MoS2 nanosheets for enhanced electrocatalytic activity in the hydrogen evolution reaction
Source: Royal Society of Chemistry journal article supplement (doi:10.1039/c4nr06754a), 2015-01-01
Supplement: c4nr06754a1.pdf [file c4nr06754a1.pdf]

Electronic Supplementary Information

**Porous Metallic MoO<sub>2</sub>-Supported MoS<sub>2</sub> Nanosheets for Enhanced  
Electrocatalytic Activities in Hydrogen Evolution Reaction**

Linjing Yang<sup>a</sup>, Weijia Zhou<sup>a\*</sup>, Dongman Hou<sup>b</sup>, Kai Zhou<sup>a</sup>, Guoqiang Li<sup>b</sup>, Ligui Li<sup>a</sup>,  
Shaowei Chen<sup>a,c\*</sup>

<sup>a</sup> New Energy Research Institute, College of Environment and Energy, South China  
University of Technology, Guangzhou Higher Education Mega Center, Guangzhou,  
Guangdong 510006, China

E-mail: [eszhouwj@scut.edu.cn](mailto:eszhouwj@scut.edu.cn) (W.J.Z.)

<sup>b</sup> School of Materials Science and Engineering, South China University of  
Technology, Tianhe District, Guangzhou, Guangdong 510641, China

<sup>c</sup> Department of Chemistry and Biochemistry, University of California, 1156 High  
Street, Santa Cruz, California 95064, United States

E-mail: [shaowei@ucsc.edu](mailto:shaowei@ucsc.edu) (S.W.C.)

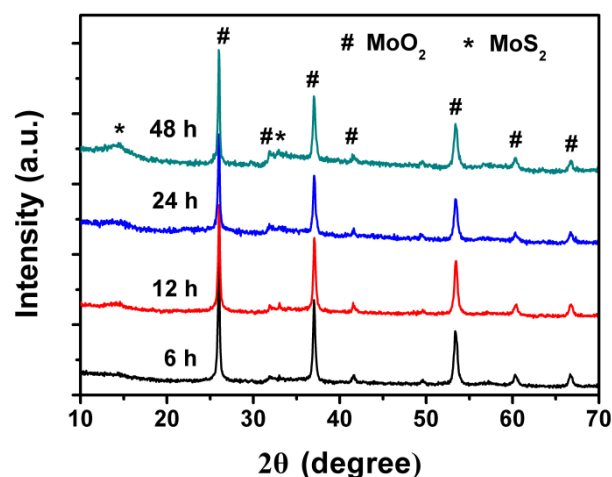

**Figure S1.** XRD of MoS<sub>2</sub>/MoO<sub>2</sub> obtained by different hydrothermal time (6 h, 12 h, 24 h and 48 h).

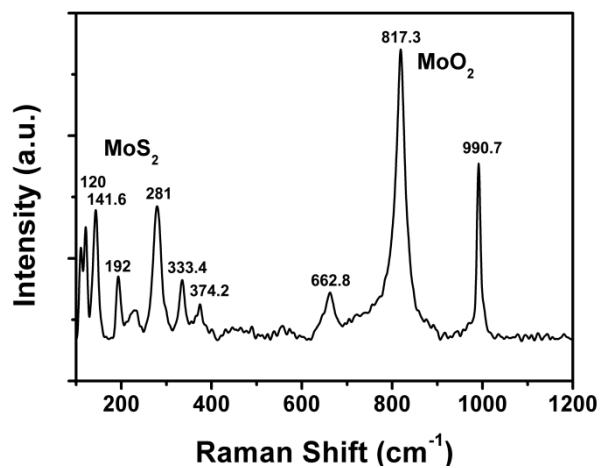

**Figure S2.** Raman spectroscopic studies of MoS<sub>2</sub>/MoO<sub>2</sub>-6h.

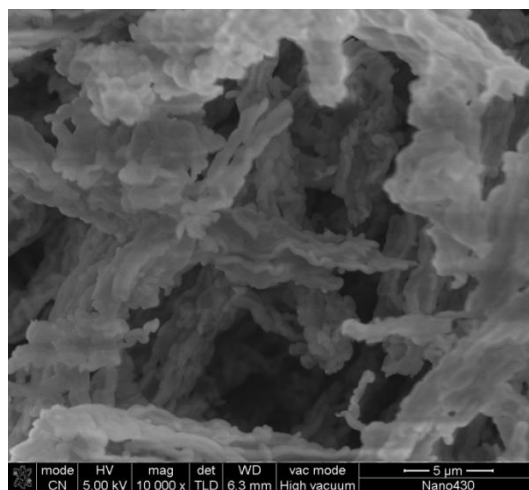

**Figure S3.** SEM image of mesoporous silicon (SBA-15).

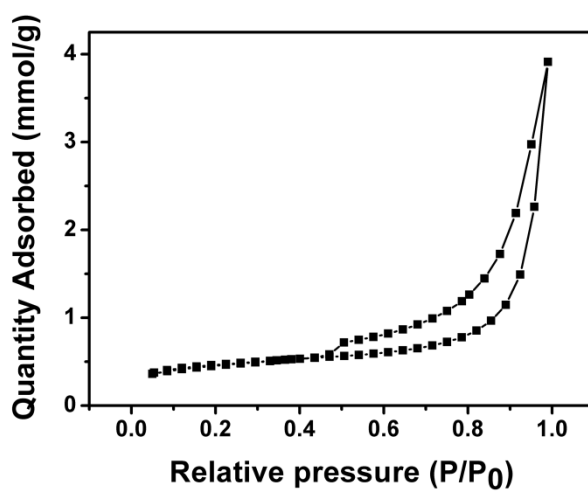

**Figure S4.** Nitrogen adsorption/desorption isotherms porous MoS<sub>2</sub>/MoO<sub>2</sub>-6h.

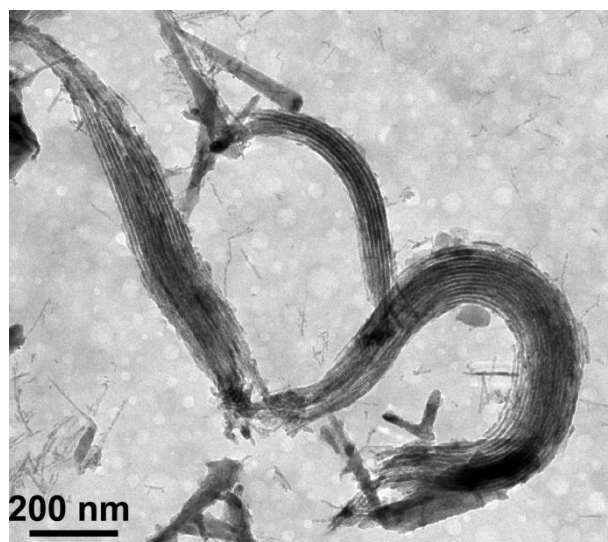

**Figure S5.** TEM image of porous MoO<sub>2</sub> with one-dimensional channels.

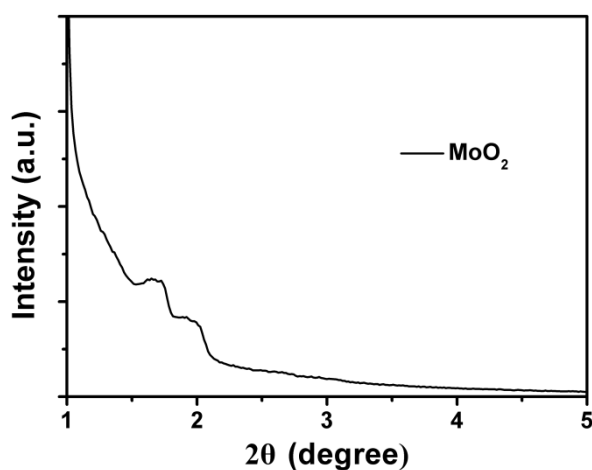

**Figure S6.** Small-angle XRD pattern of MoO<sub>2</sub>. On the basis of Bragg equation ( $2d \sin \theta = n\lambda$ ), where  $\lambda = 0.15406$  nm, the size of the periodic structure is 5.3 nm and 4.4 nm from  $\theta = 0.98^\circ$  and  $\theta = 1.99^\circ$ , respectively.

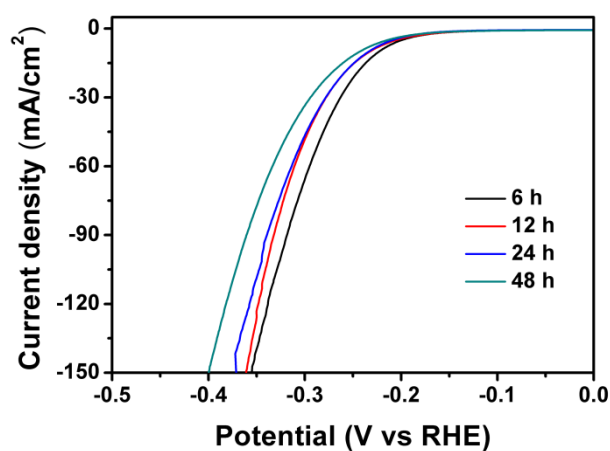

**Figure S7.** Polarization curves of MoS<sub>2</sub>/MoO<sub>2</sub> sample obtained by different hydrothermal time (6 h, 12 h, 24 h and 48 h).

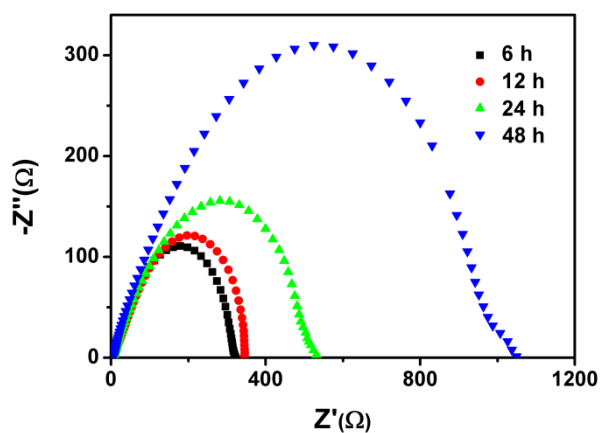

**Figure S8.** Nyquist plots of MoS<sub>2</sub>/MoO<sub>2</sub> sample obtained by different hydrothermal time (6 h, 12 h, 24 h and 48 h) at overpotential of 200 mV.

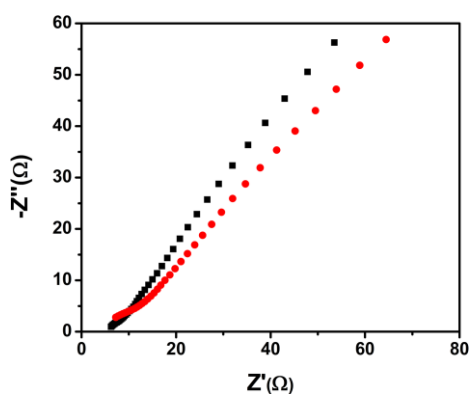

**Figure S9.** Zoom-in section of the high-frequency region of the Nyquist plots in Figure 5c, where it can be seen that  $R_s$  was reduced from 7.26  $\Omega$  for MoS<sub>2</sub> to 6.23  $\Omega$  for MoS<sub>2</sub>/MoO<sub>2</sub>-6h.

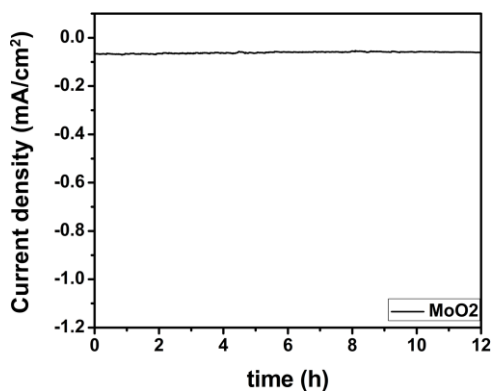

**Figure S10.** Current–time plots of the MoO<sub>2</sub> electrode at the applied potential of −0.23 V (vs. RHE)

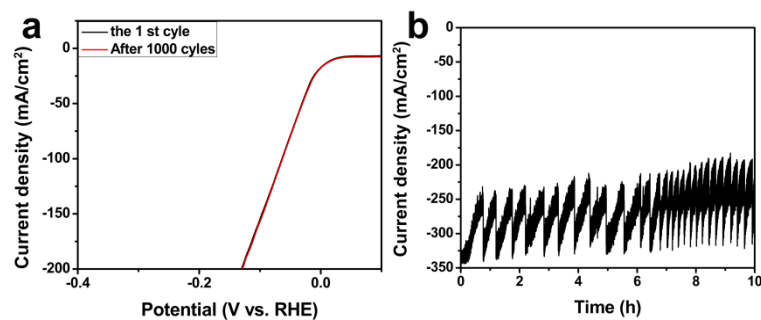

**Figure S11.** (a) HER polarization curves for the commercial 20 wt% Pt/C before and after 1000 cycles of potential sweeps. (b) Current–time plots of the commercial 20 wt% Pt/C electrode at the applied potential of  $-0.23$  V (vs. RHE).

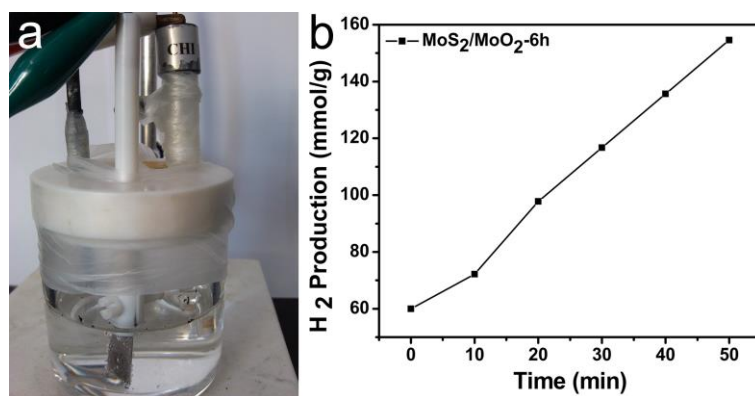

**Figure S12.** (a) Bubble formation on the MoS<sub>2</sub>/MoO<sub>2</sub>-6h modified electrode at the applied potential of  $-0.23$  V (vs. RHE). (b) Production of hydrogen gas normalized by the weight of the MoS<sub>2</sub>/MoO<sub>2</sub>-6h catalysts at different reaction times.
